# Supplementary material for: An improved Wolf pack algorithm for optimization problems: Design and evaluation
Source: PubMed Central journal article supplement (PMC8389437; doi:10.1371/journal.pone.0254239), 2021-08-26
Supplement: pone.0254239.s001.pdf [file pone.0254239.s001.pdf]

# An Improved Wolf Pack Algorithm for Optimization Problems: Design and Evaluation (Appendix)

Xuan Chen<sup>1</sup>, Feng Cheng<sup>2\*</sup>, Cong Liu<sup>3</sup>, Long Cheng<sup>4</sup>, Yin Mao<sup>5</sup>

**1** Design and Art Branch, Zhejiang Industry Polytechnic College, Zhejiang, China

**2** School of Mathematics, Southwest Jiaotong University, China.

**3** School of Computer Science, Shandong University of Technology, China.

**4** North China Electric Power University in Beijing, and Insight SFI Research Centre for Data Analytics in Dublin.

**5** Department of Computer Science, Fordham University in the New York City

\* Corresponding author. Email: chengfeng2013@swjtu.edu.cn

## 0.1 Experimental results

Tables 1-10 show the comparisons of the four indicators of the five algorithms in the 2, 5, 10, and 30 dimensions of the 10 test functions. From the minimum and maximum comparison index, it is found that the value of OGL-WPA algorithm is lower in F1, F2, F3, F4, F6, F8, F9 test function with dimension 2 than that of comparison algorithm, which is only higher in F5, F7 and F10 test function than in  $\beta$ -GWO algorithm. The value of the F1-F10 test function of in dimension 5, 10,30 is lower than that of the contrast algorithm, which indicates the solution quality of OGL-WPA algorithm is good in most cases. According to the Ave. Value, the value of the F1-F10 function is lower than that of the contrast algorithm when the dimension is 2, 5, 30, so the value is higher than that of the PSO algorithm only when the dimension is 10 but is lower than that of other test functions. The OGL-WPA algorithm has good precision. From the comparison of standard deviation, the value of the F1-F10 function of OGL-WPA algorithm is lower than that of other comparison algorithms under the condition of dimension 2, 5, 10 and 30 which explains the better convergence speed of the OGL-WPA .From the comparison results above, this algorithm improves the diversity of population after population initialization, and improves the convergence of the algorithm by selecting the first wolf effectively and adopting Levy behavior, which makes the algorithm perform well in 4 dimensions.

Table 11 shows comparisons of the elapsed time among the five algorithms in test functions. It can be found that OGL-WPA has an increased running time in comparison with other algorithms. The main reason is that OGL-WPA consumes time in population initialization and wolf selection. Although using Levy's flight decreases the local search time, the whole uptime of algorithm becomes longer.

**Table 1.** Comparison of Different Dimensions in the F1 Function

| Algorithm    | Dimension $n$ | Min Value    | Max Value  | Ave. Value    | Variance      |
|--------------|---------------|--------------|------------|---------------|---------------|
| OGL-WPA      | 2             | 1.8005e-09   | 2.1219e-06 | 2.1489e-07    | 3.2456e-07    |
|              | 5             | 1.8733e-06   | 4.9667e-05 | 1.2589e-05    | 9.0836e-06    |
|              | 10            | 4.8515e-05   | 0.0007516  | 0.000228      | 0.00015       |
|              | 30            | 0.00248      | 0.0182196  | 0.005999      | 0.00238       |
| ACO          | 2             | 0.0203476    | 16456.500  | 1989.67792    | 4983.5158     |
|              | 5             | 0.3707979    | 30581.9835 | 4471.44257    | 8648.6628     |
|              | 10            | 562.4510     | 57141.6827 | 16120.5908    | 17758.7147    |
|              | 30            | 26114.2603   | 132024.456 | 69169.7457    | 35162.8114    |
| PSO          | 2             | 6.3461e-10   | 0.0021637  | 0.000139559   | 0.0003861     |
|              | 5             | 0.005738     | 4.98512    | 1.01386505    | 1.3156749     |
|              | 10            | 2.29394      | 481.84602  | 145.480588    | 105.66809     |
|              | 30            | 1442.3533    | 6300.0227  | 3537.511730   | 1210.68219    |
| GWO          | 2             | 2.740278e-07 | 0.00022655 | 2.7396458e-05 | 3.762036e-05  |
|              | 5             | 0.0008189    | 0.05943359 | 0.0081767     | 0.0100839     |
|              | 10            | 0.0141605    | 0.4979525  | 0.1774109     | 0.1089414     |
|              | 30            | 6.904162     | 33.153283  | 19.500706     | 5.9543077     |
| $\beta$ -GWO | 2             | 1.31884e-08  | 0.00022771 | 3.0823552e-05 | 3.9395170e-05 |
|              | 5             | 0.000479     | 0.03981812 | 0.0074079     | 0.00715516    |
|              | 10            | 0.039159     | 0.49914867 | 0.1783383     | 0.11130467    |
|              | 30            | 6.905039     | 33.7413895 | 19.527661     | 6.00519511    |

**Table 2.** Comparison of Different Dimensions in the F2 Function

| Algorithm    | Dimension $n$ | Min Value   | Max Value    | Ave. Value  | Variance     |
|--------------|---------------|-------------|--------------|-------------|--------------|
| OGL-WPA      | 2             | 4.6788e-05  | 0.00102      | 0.00027     | 0.000163     |
|              | 5             | 0.00091     | 0.00624      | 0.00312     | 0.001064     |
|              | 10            | 0.00832     | 0.02214      | 0.01437     | 0.003336     |
|              | 30            | 0.08383     | 0.14861      | 0.11945     | 0.015775     |
| ACO          | 2             | 0.171701    | 90.7335      | 9.18269     | 24.75729     |
|              | 5             | 0.847493    | 16850.7147   | 798.050     | 2890.376     |
|              | 10            | 4.727616    | 333392446.90 | 10854563    | 49590932.044 |
|              | 30            | 44551072.64 | 1.66977e+20  | 3.41849e+18 | 2.36061e+19  |
| PSO          | 2             | 4.61154e-06 | 0.00995994   | 0.00100221  | 0.00200884   |
|              | 5             | 0.004236052 | 1.2703288    | 0.2266671   | 0.2595154    |
|              | 10            | 1.0877692   | 8.44706953   | 4.5504297   | 1.89244510   |
|              | 30            | 15.01764810 | 66.971699    | 32.4898099  | 10.564354    |
| GWO          | 2             | 0.0001384   | 0.0020792    | 0.0007216   | 0.0004789    |
|              | 5             | 0.0039677   | 0.0344367    | 0.0155093   | 0.0065253    |
|              | 10            | 0.0389009   | 0.2332112    | 0.1175955   | 0.0417651    |
|              | 30            | 1.5549388   | 4.3662240    | 2.7791748   | 0.6740869    |
| $\beta$ -GWO | 2             | 0.00012913  | 0.00208936   | 0.00072609  | 0.00047575   |
|              | 5             | 0.00422805  | 0.034429330  | 0.01552950  | 0.006742115  |
|              | 10            | 0.03888746  | 0.233210126  | 0.11356567  | 0.042478287  |
|              | 30            | 1.59233317  | 4.366104518  | 2.77830880  | 0.666883028  |

**Table 3.** Comparison of Different Dimensions in the F3 Function

| Algorithm    | Dimension $n$ | Min Value     | Max Value   | Ave. Value  | Variance    |
|--------------|---------------|---------------|-------------|-------------|-------------|
| OGL-WPA      | 2             | 1.77255e-07   | 0.000392    | 7.26540e-05 | 7.44813e-05 |
|              | 5             | 2.64471e-06   | 0.002139    | 0.00037     | 0.00037     |
|              | 10            | 8.61429e-06   | 0.002065    | 0.00066     | 0.00060     |
|              | 30            | 4.06432e-05   | 0.008976    | 0.00177     | 0.00189     |
| ACO          | 2             | 0.025686      | 270.41155   | 38.91627    | 88.25971    |
|              | 5             | 0.018994      | 1017.43652  | 96.19119    | 273.9338    |
|              | 10            | 0.176349      | 3131.65679  | 280.8745    | 828.66022   |
|              | 30            | 0.159286      | 13060.0157  | 758.43687   | 2825.95712  |
| PSO          | 2             | 4.0795811e-11 | 0.0016373   | 9.93502e-05 | 0.00028406  |
|              | 5             | 9.6079588e-11 | 0.00144573  | 0.0001186   | 0.00025395  |
|              | 10            | 1.91657e-09   | 0.01397033  | 0.0005589   | 0.00206236  |
|              | 30            | 8.92441e-11   | 0.039662004 | 0.0017298   | 0.0059671   |
| GWO          | 2             | 2.88641e-05   | 0.0040572   | 0.00135711  | 0.0010650   |
|              | 5             | 1.43835e-05   | 0.0682715   | 0.01137611  | 0.0145121   |
|              | 10            | 0.0005063     | 0.2047103   | 0.04217550  | 0.0410000   |
|              | 30            | 0.0115524     | 3.1563488   | 0.75601802  | 0.7360468   |
| $\beta$ -GWO | 2             | 2.8864111e-05 | 0.00405729  | 0.00129487  | 0.0010510   |
|              | 5             | 0.0006467     | 0.05538321  | 0.01129903  | 0.01277357  |
|              | 10            | 0.0028476     | 0.20470933  | 0.04467555  | 0.04431984  |
|              | 30            | 0.0115512     | 3.15637842  | 0.69541680  | 0.73811930  |

**Table 4.** Comparison of Different Dimensions in the F4 Function

| Algorithm    | Dimension $n$ | Min Value     | Max Value | Ave. Value  | Variance   |
|--------------|---------------|---------------|-----------|-------------|------------|
| OGL-WPA      | 2             | 0.000102      | 0.000979  | 0.0004079   | 0.00022919 |
|              | 5             | 0.001218      | 0.006814  | 0.0038199   | 0.00145466 |
|              | 10            | 0.005724      | 0.025244  | 0.0129461   | 0.00352010 |
|              | 30            | 0.07380       | 0.240923  | 0.1228409   | 0.03491179 |
| ACO          | 2             | 0.15161       | 98.9014   | 40.89212    | 44.35097   |
|              | 5             | 3.97965       | 98.8703   | 77.03869    | 28.64099   |
|              | 10            | 28.8742       | 99.63691  | 90.60360    | 12.575049  |
|              | 30            | 87.06238      | 99.83433  | 96.58320    | 2.8063077  |
| PSO          | 2             | 2.3331863e-05 | 0.1167497 | 0.0079861   | 0.01785393 |
|              | 5             | 0.0515829     | 4.4855845 | 0.8557691   | 0.88475519 |
|              | 10            | 4.1968123     | 19.512747 | 10.652086   | 3.66702843 |
|              | 30            | 15.841233     | 39.906120 | 26.712640   | 4.98594719 |
| GWO          | 2             | 0.0001587     | 0.0137215 | 0.00352821  | 0.0026886  |
|              | 5             | 0.0130225     | 0.1344075 | 0.05184759  | 0.02551751 |
|              | 10            | 0.0932209     | 1.3046918 | 0.36033598  | 0.19607640 |
|              | 30            | 3.3728250     | 7.9894145 | 5.17729170  | 1.12082451 |
| $\beta$ -GWO | 2             | 0.00013810    | 0.0104685 | 0.003603730 | 0.00265845 |
|              | 5             | 0.01302256    | 0.1074601 | 0.051506911 | 0.02447575 |
|              | 10            | 0.09322015    | 1.3046908 | 0.363599740 | 0.19894765 |
|              | 30            | 2.77459856    | 7.9894140 | 5.162038301 | 1.19848206 |

**Table 5.** Comparison of Different Dimensions in the F5 Function

| Algorithm    | Dimension $n$ | Min Value     | Max Value    | Ave. Value    | Variance     |
|--------------|---------------|---------------|--------------|---------------|--------------|
| OGL-WPA      | 2             | 2.85552e-07   | 0.000188     | 3.81922e-05   | 4.44986e-05  |
|              | 5             | 0.00178       | 32.66563     | 2.449445      | 5.11299      |
|              | 10            | 0.02726       | 11.55529     | 2.097849      | 2.25198      |
|              | 30            | 1.24227       | 134.5876     | 34.45741      | 34.1515      |
| ACO          | 2             | 0.1722043     | 79962962.92  | 7491663.86    | 22733221.52  |
|              | 5             | 18.845310     | 167820742.75 | 23591724.06   | 55016275.21  |
|              | 10            | 259.87970     | 323733723.58 | 45288706.35   | 99657763.65  |
|              | 30            | 50005.033     | 776897069.35 | 144735089.29  | 274523195.49 |
| PSO          | 2             | 4.536701e-07  | 7.70186      | 0.2493286     | 1.10263      |
|              | 5             | 1.6381553     | 1731.353     | 165.48465     | 360.10007    |
|              | 10            | 216.66020     | 67022.206    | 8255.2939     | 13456.5928   |
|              | 30            | 135286.400    | 2905425.250  | 847467.368    | 634605.300   |
| GWO          | 2             | 2.8248945e-07 | 0.0001932    | 4.142770e-05  | 4.738544e-05 |
|              | 5             | 0.0347995     | 4.6612108    | 2.252820      | 1.485809     |
|              | 10            | 5.6309060     | 12.4789171   | 9.6771086     | 1.174687     |
|              | 30            | 51.902806     | 170.387384   | 92.029587     | 23.22154     |
| $\beta$ -GWO | 2             | 5.2858008e-08 | 0.00075780   | 7.0684870e-05 | 0.0001225    |
|              | 5             | 0.0349170     | 4.66121380   | 2.3129912     | 1.4970110    |
|              | 10            | 5.6318434     | 12.4783746   | 9.6774197     | 1.1742258    |
|              | 30            | 51.902005     | 170.388762   | 92.029611     | 23.221242    |

**Table 6.** Comparison of Different Dimensions in the F6 Function

| Algorithm    | Dimension $n$ | Min Value    | Max Value   | Ave. Value    | Variance      |
|--------------|---------------|--------------|-------------|---------------|---------------|
| OGL-WPA      | 2             | 4.82180e-10  | 9.29733e-07 | 2.09207e-07   | 2.16043e-07   |
|              | 5             | 1.71394e-06  | 5.87215e-05 | 1.59973e-05   | 1.23256e-05   |
|              | 10            | 4.14823e-05  | 0.000549    | 0.00021       | 0.00012       |
|              | 30            | 0.002438     | 0.013420    | 0.00611       | 0.00219       |
| ACO          | 2             | 0.03378920   | 16638.3892  | 1698.4606     | 4631.1454     |
|              | 5             | 0.31684722   | 30570.9268  | 4916.7122     | 9140.7732     |
|              | 10            | 611.799391   | 56516.6916  | 16125.4211    | 17752.7511    |
|              | 30            | 26202.1263   | 132628.8162 | 69217.9809    | 35142.1199    |
| PSO          | 2             | 2.242653e-10 | 0.00459714  | 0.00033719    | 0.00085328    |
|              | 5             | 0.0004307558 | 12.333401   | 1.12429536    | 2.12086752    |
|              | 10            | 12.1117574   | 560.90399   | 143.552158    | 115.685413    |
|              | 30            | 1363.98861   | 7473.0983   | 3643.11901    | 1311.62557    |
| GWO          | 2             | 5.11948e-08  | 0.0001156   | 2.851317e-05  | 2.73035e-05   |
|              | 5             | 0.000511     | 0.0139887   | 0.004852      | 0.003110      |
|              | 10            | 0.038322     | 0.5918692   | 0.186834      | 0.119432      |
|              | 30            | 11.08346     | 30.331938   | 19.17017      | 4.696073      |
| $\beta$ -GWO | 2             | 5.188776e-08 | 0.00011561  | 2.5702547e-05 | 2.4974229e-05 |
|              | 5             | 0.000340     | 0.01681782  | 0.0048192     | 0.0033328     |
|              | 10            | 0.033766     | 0.59184899  | 0.1816714     | 0.1182955     |
|              | 30            | 11.08352     | 30.3320805  | 19.164739     | 4.6750831     |

**Table 7.** Comparison of Different Dimensions in the F7 Function

| Algorithm    | Dimension n | Min Value    | Max Value   | Ave. Value    | Variance      |
|--------------|-------------|--------------|-------------|---------------|---------------|
| OGL-WPA      | 2           | 5.47779e-08  | 1.24096e-05 | 2.97501e-06   | 3.34417e-06   |
|              | 5           | 2.55035e-05  | 0.00070     | 0.00021       | 0.00015       |
|              | 10          | 0.00222      | 5.97331     | 1.72416       | 1.16982       |
|              | 30          | 2.04969      | 26.7482     | 11.2121       | 5.12330       |
| ACO          | 2           | 1.7772       | 55.2792     | 25.3269       | 13.1594       |
|              | 5           | 33.0470      | 133.3064    | 81.6386       | 18.5751       |
|              | 10          | 88.0778      | 239.8591    | 173.6402      | 35.0953       |
|              | 30          | 484.4055     | 645.3189    | 544.7705      | 37.1596       |
| PSO          | 2           | 7.322583e-09 | 1.0012715   | 0.1596454     | 0.350144      |
|              | 5           | 2.005007     | 22.881284   | 8.2732804     | 4.629569      |
|              | 10          | 14.86362     | 62.029896   | 34.954967     | 11.06757      |
|              | 30          | 120.8475     | 264.78830   | 201.04720     | 28.58588      |
| GWO          | 2           | 1.44108e-07  | 0.0001148   | 1.834114e-05  | 2.29459e-05   |
|              | 5           | 0.000635     | 7.3094649   | 2.987942      | 1.961736      |
|              | 10          | 2.043079     | 48.276514   | 17.40869      | 12.63959      |
|              | 30          | 31.07874     | 233.17123   | 118.3956      | 69.370107     |
| $\beta$ -GWO | 2           | 1.182404e-08 | 0.0001142   | 1.7299998e-05 | 2.4427828e-05 |
|              | 5           | 0.001142     | 7.3094699   | 2.922149      | 1.9029195     |
|              | 10          | 2.043013     | 48.273818   | 16.96334      | 12.506471     |
|              | 30          | 29.06587     | 233.17038   | 114.7511      | 71.231511     |



**Table 8.** Comparison of Different Dimensions in the F8 Function

| Algorithm    | Dimension $n$ | Min Value    | Max Value | Ave. Value | Variance   |
|--------------|---------------|--------------|-----------|------------|------------|
| OGL-WPA      | 2             | 0.00027      | 0.003488  | 0.00135    | 0.00077    |
|              | 5             | 0.00292      | 0.014121  | 0.00789    | 0.00293    |
|              | 10            | 0.00814      | 0.026876  | 0.01713    | 0.00427    |
|              | 30            | 0.03324      | 0.062769  | 0.04827    | 0.00678    |
| ACO          | 2             | 1.6889       | 21.76511  | 17.16632   | 6.64093    |
|              | 5             | 18.9447      | 21.69285  | 20.64366   | 0.65206    |
|              | 10            | 19.4543      | 21.61511  | 20.84760   | 0.39061    |
|              | 30            | 20.7290      | 21.42201  | 21.04721   | 0.16063    |
| PSO          | 2             | 8.395351e-05 | 0.1240424 | 0.0098718  | 0.0202415  |
|              | 5             | 0.0183400    | 4.1681288 | 1.9215949  | 1.1884333  |
|              | 10            | 3.0564615    | 10.039153 | 6.4053804  | 1.6950190  |
|              | 30            | 9.4797347    | 15.245363 | 12.033790  | 1.2499723  |
| GWO          | 2             | 0.000172     | 0.011201  | 0.0039112  | 0.002829   |
|              | 5             | 0.011834     | 0.152648  | 0.0479688  | 0.027839   |
|              | 10            | 0.118492     | 1.2374913 | 0.3267526  | 0.21861631 |
|              | 30            | 1.754597     | 3.8467824 | 2.9454203  | 0.40191428 |
| $\beta$ -GWO | 2             | 0.0002898    | 0.0134289 | 0.0045463  | 0.00335943 |
|              | 5             | 0.0118460    | 0.1526140 | 0.0461077  | 0.02794481 |
|              | 10            | 0.1184841    | 1.5621638 | 0.3642791  | 0.28184649 |
|              | 30            | 1.7545989    | 3.8467740 | 2.9298113  | 0.41075436 |

**Table 9.** Comparison of Different Dimensions in the F9 Function

| Algorithm    | Dimension $n$ | Min Value    | Max Value   | Ave. Value  | Variance    |
|--------------|---------------|--------------|-------------|-------------|-------------|
| OGL-WPA      | 2             | 1.68806e-07  | 1.92279e-06 | 5.93896e-07 | 3.30489e-07 |
|              | 5             | 3.54352e-06  | 0.01175     | 0.00409     | 0.00402     |
|              | 10            | 5.07908e-05  | 0.01540     | 0.00837     | 0.00405     |
|              | 30            | 0.00020      | 0.04130     | 0.00874     | 0.00886     |
| ACO          | 2             | 0.022491     | 1.994289    | 0.390329    | 0.471301    |
|              | 5             | 0.089352     | 1.054771    | 0.411349    | 0.284688    |
|              | 10            | 0.929220     | 1.131939    | 1.084629    | 0.032856    |
|              | 30            | 1.132125     | 1.1816641   | 1.159412    | 0.010966    |
| PSO          | 2             | 0.0001525    | 0.0381121   | 0.017771    | 0.009673    |
|              | 5             | 0.0438146    | 0.3836333   | 0.150870    | 0.0723825   |
|              | 10            | 0.1934204    | 0.8805399   | 0.528817    | 0.1916648   |
|              | 30            | 1.0162371    | 1.0399052   | 1.029196    | 0.0054230   |
| GWO          | 2             | 4.58977e-07  | 0.008887    | 0.001384    | 0.002382    |
|              | 5             | 0.05613      | 0.19672     | 0.12426     | 0.03146     |
|              | 10            | 0.09968      | 0.73528     | 0.54092     | 0.10674     |
|              | 30            | 0.23725      | 0.98854     | 0.41591     | 0.15055     |
| $\beta$ -GWO | 2             | 2.278180e-07 | 0.008887    | 0.001296    | 0.00229     |
|              | 5             | 0.0561339    | 0.196720    | 0.125130    | 0.03284     |
|              | 10            | 0.0996871    | 0.735281    | 0.5373313   | 0.12433     |
|              | 30            | 0.2372754    | 0.971461    | 0.4220914   | 0.14777     |

**Table 10.** Comparison of Different Dimensions in the F10 Function

| Algorithm    | Dimension $n$ | Min Value    | Max Value     | Ave. Value    | Variance      |
|--------------|---------------|--------------|---------------|---------------|---------------|
| OGL-WPA      | 2             | 1.47145e-06  | 0.000572      | 9.33785e-05   | 0.000122      |
|              | 5             | 1.22936e-11  | 5.495312e-05  | 7.09154e-06   | 1.148543e-05  |
|              | 10            | 3.81079e-10  | 1.395420e-05  | 2.01339e-06   | 3.429176e-06  |
|              | 30            | 1.01920e-11  | 6.410171e-07  | 1.41122e-07   | 1.532696e-07  |
| ACO          | 2             | 0.35206      | 303120900.74  | 15094438.87   | 61049304.295  |
|              | 5             | 0.23918      | 530948881.39  | 36257185.61   | 125880546.27  |
|              | 10            | 0.04124      | 964022573.85  | 102621178.35  | 261018818.43  |
|              | 30            | 92918.31     | 2179533421.39 | 304714873.44  | 689903987.10  |
| PSO          | 2             | 1.68014e-09  | 0.2588090     | 0.0139264     | 0.03969680    |
|              | 5             | 1.82104e-07  | 0.0286885     | 0.0020899     | 0.00574737    |
|              | 10            | 8.31437e-10  | 53.872189     | 1.6078264     | 8.39749468    |
|              | 30            | 4.24035e-07  | 260726.74     | 18682.353     | 42142.8437    |
| GWO          | 2             | 6.33155e-05  | 0.012798      | 0.002738      | 0.002435      |
|              | 5             | 3.30133e-05  | 0.004957      | 0.001030      | 0.001033      |
|              | 10            | 7.87573e-06  | 0.001855      | 0.0004393     | 0.000479      |
|              | 30            | 2.758760e-06 | 0.00046       | 8.662211e-05  | 9.191790e-05  |
| $\beta$ -GWO | 2             | 7.152411e-05 | 0.007623      | 0.0022814     | 0.0018622     |
|              | 5             | 2.533594e-05 | 0.004958      | 0.0011217     | 0.0011092     |
|              | 10            | 1.896208e-06 | 0.0018549     | 0.0004660     | 0.0004763     |
|              | 30            | 2.142452e-07 | 0.0004634     | 8.4814786e-05 | 8.9742677e-05 |

**Table 11.** Time Comparison of 5 Algorithms in Test Functions

| Algorithm    | Dimension $n$ | $F1$   | $F2$   | $F3$    | $F4$    | $F5$    | $F6$    | $F7$  |
|--------------|---------------|--------|--------|---------|---------|---------|---------|-------|
| OGL-WPA      | 2             | 1.424  | 2.036  | 2.390   | 1.287   | 1.507   | 1.2040  | 2.148 |
|              | 5             | 2.647  | 4.038  | 8.249   | 2.742   | 6.084   | 3.1370  | 4.913 |
|              | 10            | 4.863  | 7.810  | 26.695  | 5.396   | 13.011  | 4.960   | 9.577 |
|              | 30            | 15.95  | 27.58  | 236.85  | 18.159  | 75.258  | 17.927  | 38.94 |
| ACO          | 2             | 0.289  | 0.3670 | 0.6110  | 0.2840  | 0.3250  | 0.2280  | 0.290 |
|              | 5             | 0.646  | 0.7170 | 1.3820  | 0.6290  | 1.1190  | 0.5950  | 0.762 |
|              | 10            | 1.239  | 1.3870 | 3.8580  | 1.2700  | 1.9210  | 1.6720  | 1.345 |
|              | 30            | 3.361  | 3.7150 | 22.700  | 3.9940  | 8.2000  | 3.7020  | 4.721 |
| PSO          | 2             | 0.192  | 0.1720 | 0.2790  | 0.1610  | 0.2100  | 0.1480  | 0.258 |
|              | 5             | 0.359  | 0.3460 | 0.8070  | 0.3380  | 0.5270  | 0.3970  | 0.487 |
|              | 10            | 0.995  | 0.9900 | 2.4840  | 0.6830  | 1.1760  | 0.7320  | 0.791 |
|              | 30            | 2.247  | 2.7110 | 16.536  | 1.9310  | 5.1980  | 1.9230  | 2.481 |
| GWO          | 2             | 0.255  | 0.206  | 0.302   | 0.191   | 0.340   | 0.223   | 0.214 |
|              | 5             | 0.521  | 0.5450 | 1.005   | 0.536   | 0.694   | 0.531   | 0.589 |
|              | 10            | 1.098  | 1.239  | 2.908   | 1.198   | 1.619   | 1.174   | 1.300 |
|              | 30            | 4.475  | 4.778  | 19.29   | 4.782   | 7.936   | 4.793   | 5.224 |
| $\beta$ -GWO | 2             | 0.734  | 1.083  | 1.156   | 0.783   | 0.808   | 0.924   | 0.997 |
|              | 5             | 4.153  | 4.139  | 5.847   | 4.004   | 4.605   | 4.198   | 4.118 |
|              | 10            | 12.582 | 12.176 | 14.755  | 13.709  | 15.659  | 14.997  | 14.66 |
|              | 30            | 103.31 | 104.15 | 126.333 | 102.097 | 113.266 | 145.464 | 139.5 |
